# Supplementary material for: The Periparturient Gut Microbiota’s Modifications in Shaziling Sows concerning Bile Acids
Source: MDPI journal article supplement (doi:10.3390/metabo13010068), 2023-01-01
Supplement: s1 [file s1]

Supplementary Table S1 Composition and nutrient levels of basal diets

| Ingredient (%)          | Content        |           |
|-------------------------|----------------|-----------|
|                         | Late gestation | lactation |
| Soybean meal            | 5.40           | 19.50     |
| Corn                    |                | 43.18     |
| Wheat                   | 20.00          | 12.00     |
| Rice                    | 38.98          | 13.00     |
| Bran                    | 18.20          | 1.00      |
| Rice bran               | 9.70           | 4.00      |
| Soybean Oil             | 2.00           | 2.00      |
| All premixes            | 5.72           | 5.32      |
| Total                   | 100.00         | 100.00    |
| Nutrient composition    | Late gestation | lactation |
| DE MJ/Kg                | 13.10          | 14.58     |
| ME MJ/Kg                | 12.62          | 14.05     |
| CP %                    | 12.38          | 15.22     |
| SID Lysine              | 0.44           | 0.68      |
| SID Methionine          | 0.18           | 0.23      |
| SID Threonine           | 0.32           | 0.47      |
| SID Tryptophan          | 0.12           | 0.14      |
| SID Valine              | 0.54           | 0.65      |
| SID Methionine+Cysteine | 0.33           | 0.41      |
| CF %                    | 7.37           | 5.10      |
| NDF %                   | 19.88          | 15.76     |
| Ca %                    | 0.07           | 0.10      |
| TP %                    | 0.52           | 0.38      |
